# Supplementary material for: Antibody-mediated neutralization of myelin-associated EphrinB3 accelerates CNS remyelination
Source: PubMed Central journal article supplement (PMC4713754; doi:10.1007/s00401-015-1521-1), 2015-12-19

**Supplementary Fig. 2**

**a** Experimental design and chromatograms of CM, High Q and S100 columns

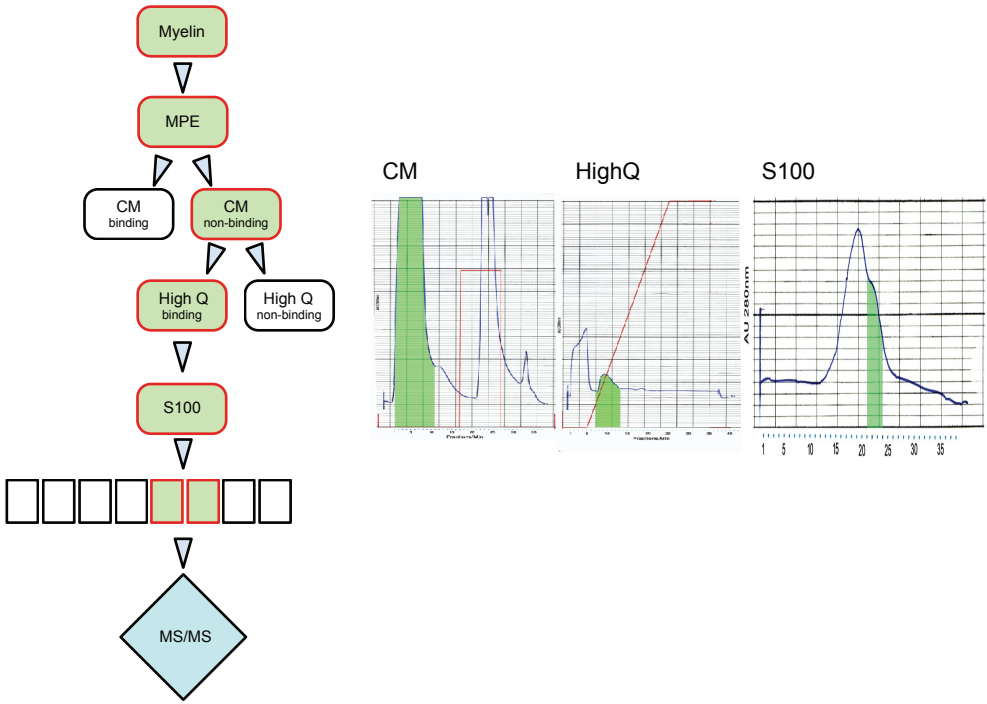

**b** Inhibition of OPC differentiation in the presence of enriched fractions

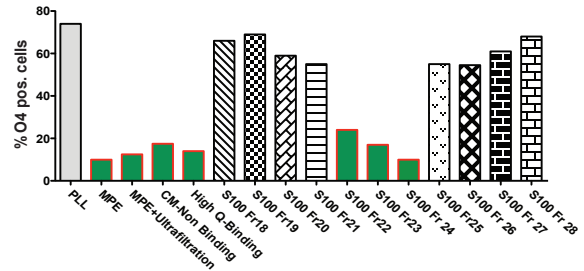

**c** Enrichment of EphrinB in inhibitory fractions

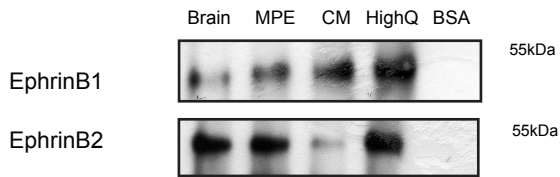

Supplement: 401_2015_1521_MOESM3_ESM.pdf [file 401_2015_1521_MOESM3_ESM.pdf]
