# Supplementary material for: Antibody-mediated neutralization of myelin-associated EphrinB3 accelerates CNS remyelination
Source: PubMed Central journal article supplement (PMC4713754; doi:10.1007/s00401-015-1521-1), 2015-12-19

**Supplementary Fig. 5**

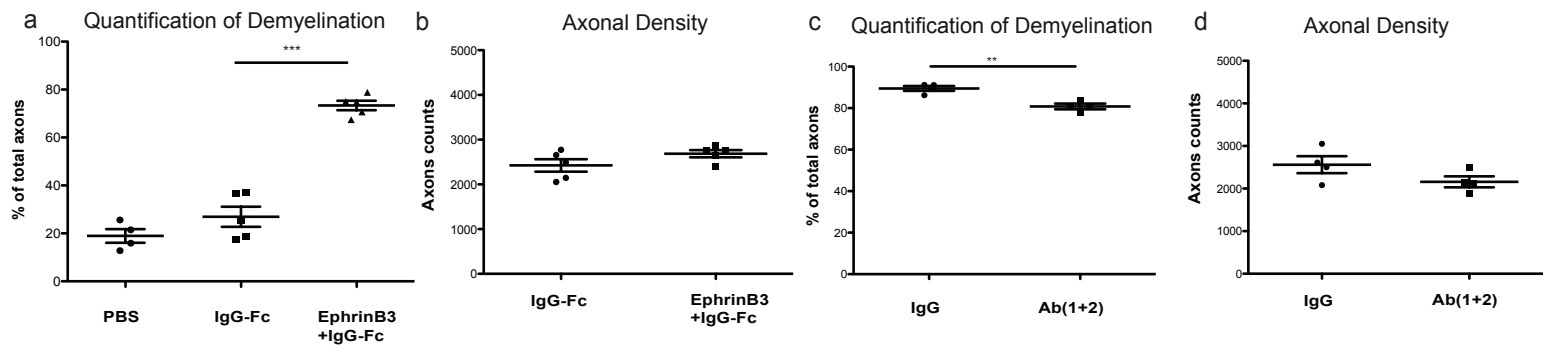

Supplement: 401_2015_1521_MOESM6_ESM.pdf [file 401_2015_1521_MOESM6_ESM.pdf]
